# Supplementary material for: Evolution of Cariogenic Character in Streptococcus mutans: Horizontal Transmission of Glycosyl Hydrolase Family 70 Genes
Source: PubMed Central journal article supplement — Sci Rep. 2012 Jul 18;2:518. doi: 10.1038/srep00518 (PMC3399136; doi:10.1038/srep00518), 2012-07-18
Supplement: srep00518-s1.pdf [file srep00518-s1.pdf]

## Supplementary Information for

### **Evolution of Cariogenic Character in *Streptococcus mutans*: Horizontal Transmission of Glycosyl Hydrolase Family 70 Genes**

Tomonori Hoshino<sup>1</sup>, Taku Fujiwara<sup>1\*</sup> & Shigetada Kawabata<sup>2</sup>

<sup>1</sup>Department of Pediatric Dentistry, Nagasaki University Graduate School of Biomedical Sciences, 1-7-1 Sakamoto, Nagasaki 852-8588, Japan

<sup>2</sup>Department of Oral and Molecular Microbiology, Osaka University Graduate School of Dentistry, 1-8 Yamadaoka, Suita, Osaka 565-0871, Japan

**Supplementary Table S1| List of glycosyl hydrolase family 70 enzymes used for analysis.**

| <b>Genus<br/>Species</b>    | <b>Protein Name;<br/>Abbreviated Name</b> | <b>Gene<br/>Name</b> | <b>Accession<br/>Number</b> | <b>Glucan<br/>Linkage</b>     |
|-----------------------------|-------------------------------------------|----------------------|-----------------------------|-------------------------------|
| <b><i>Streptococcus</i></b> |                                           |                      |                             |                               |
| <i>S. mutans</i>            | GTFIGtfB                                  | <i>gtfB</i>          | D88651                      | $\alpha$ -1,3                 |
|                             | GTF-SI; GtfC                              | <i>gtfC</i>          | D88652                      | $\alpha$ -1,3 & $\alpha$ -1,6 |
|                             | GTF-S; GtfD                               | <i>gtfD</i>          | D88653                      | $\alpha$ -1,6                 |
| <i>S. sobrinus</i>          | GTFIGtfI1sob                              | <i>gtfI1</i>         | D63570                      | $\alpha$ -1,3                 |
|                             | GTFIGtfI2sob                              | <i>gtfI2</i>         | D13858                      | $\alpha$ -1,3                 |
|                             | GTF-T; GtfTsob                            | <i>gtfT</i>          | AY966490                    | $\alpha$ -1,6                 |
|                             | Glucosyltransferase; GtfU                 | <i>gtfU</i>          | AB089438                    | $\alpha$ -1,6                 |
|                             | GTF-S; GtfSdow                            | <i>gtfS</i>          | M30943                      | $\alpha$ -1,6                 |
| <i>S. downei</i>            | GTFIGtfI1dow                              | <i>gtfI1</i>         | M17391                      | $\alpha$ -1,3                 |
|                             | GTFIGtfI2dow                              | <i>gtfI2</i>         | D90213                      | $\alpha$ -1,3                 |
|                             | GTF-S; GtfS1cri                           | <i>gtfS</i>          | AB026123                    | $\alpha$ -1,6                 |
| <i>S. criceti</i>           | GTF-S; GtfS2cri                           | <i>gtfT</i>          | AB026123                    | $\alpha$ -1,6                 |
|                             | Glucosyltransferase-I; GtfJ               | <i>gtfJ</i>          | Z11873                      | $\alpha$ -1,3                 |
| <i>S. salivarius</i>        | Glucosyltransferase S; GtfK               | <i>gtfK</i>          | Z11872                      | $\alpha$ -1,6                 |
|                             | Glucosyltransferase; GtfL                 | <i>gtfL</i>          | L35495                      | $\alpha$ -1,3 & $\alpha$ -1,6 |
|                             | Glucosyltransferase; GtfM                 | <i>gtfM</i>          | L35928                      | $\alpha$ -1,6                 |
|                             | Glucosyltransferase N; GtfN               | <i>gtfN</i>          | AF049609                    | $\alpha$ -1,6                 |
|                             | Glucosyltransferase; GtfP                 | <i>gtfP</i>          | AB252650                    | $\alpha$ -1,6                 |
| <i>S. sanguinis</i>         | Glucosyltransferase; GtfR                 | <i>gtfR</i>          | AB025228                    | $\alpha$ -1,6                 |
| <i>S. oralis</i>            | Glucosyltransferase; GtfG                 | <i>gtfG</i>          | U12643                      | $\alpha$ -1,6                 |
| <i>S. gordonii</i>          | Glucosyltransferase; GtfG                 | <i>gtfG</i>          | U12643                      | $\alpha$ -1,6                 |
| <b><i>Leuconostoc</i></b>   |                                           |                      |                             |                               |
| <i>L. mesenteroides</i>     | Glucosyltransferase; DsrA                 | <i>dsrA</i>          | U38181                      | $\alpha$ -1,6                 |
|                             | Glucosyltransferase; DsrB                 | <i>dsrB</i>          | AF030129                    | $\alpha$ -1,6                 |
|                             | Dextranucrase; Dsrb742                    | <i>dsrb742</i>       | AF294469                    | No reference                  |
|                             | Dextranucrase; DsrC                       | <i>dsrC</i>          | AJ250172                    | No reference                  |
|                             | Dextranucrase; DsrD                       | <i>dsrD</i>          | AY017384                    | No reference                  |
|                             | Dextranucrase; DsrE                       | <i>dsrE</i>          | AJ430204                    | $\alpha$ -1,6 & $\alpha$ -1,2 |
|                             | Dextranucrase; DsrP                       | <i>dsrP</i>          | AY504865                    | No reference                  |
|                             | Dextranucrase; DsrR                       | <i>dsrR</i>          | AY142210                    | No reference                  |
|                             | Dextranucrase; DsrT                       | <i>dsrT</i>          | AB020020                    | No reference                  |
|                             | Dextranucrase; DsrX                       | <i>dsrX</i>          | AY743959                    | No reference                  |
|                             | Dextranucrase; DEX                        | DEX                  | U81374                      | No reference                  |
|                             | Alternansucrase; Asr                      | <i>asr</i>           | AJ250173                    | $\alpha$ -1,3 & $\alpha$ -1,6 |
|                             | <b><i>Lactobacillus</i></b>               |                      |                             |                               |
| <i>L. parabuchneri</i>      | Glucansucrase; GTF33                      | None                 | AY697432                    | $\alpha$ -1,6                 |
| <i>L. reuteri</i>           | Lr 1943; Lr1943                           | <i>lr1943</i>        | DQ074948                    | No reference                  |
|                             | Glucansucrase; GTF55730                   | None                 | AY911856                    | $\alpha$ -1,4 & $\alpha$ -1,6 |
|                             | Glucansucrase; GTFA                       | None                 | AY697435                    | $\alpha$ -1,4                 |
|                             | Glucansucrase; GTFB                       | None                 | AY697435                    | $\alpha$ -1,6                 |
|                             | Glucansucrase; GTFML1                     | <i>gtfML1</i>        | AY697431                    | No Product                    |
|                             | Glucansucrase; GTFML4                     | <i>gtfML4</i>        | AY697431                    | $\alpha$ -1,3                 |
|                             | Glucansucrase; GTF180                     | <i>gtf180</i>        | AY697430                    | No reference                  |
|                             |                                           |                      |                             | $\alpha$ -1,6                 |
| <i>L. fermentum</i>         | Glucansucrase; GTFKg3                     | <i>gtfKg3</i>        | AY697433                    | $\alpha$ -1,6                 |
| <i>L. sakei</i>             | Glucansucrase; GTFKg15                    | <i>gtfKg15</i>       | AY697434                    | $\alpha$ -1,6                 |
| <b><i>Lactococcus</i></b>   |                                           |                      |                             |                               |
| <i>L. lactis</i>            | Glucosyltransferase-S; PspA               | <i>pspA</i>          | AE006451                    | $\alpha$ -1,6                 |
| subsp. <i>lactis</i>        | Glucosyltransferase-S; PspB               | <i>pspB</i>          | AE006451                    | $\alpha$ -1,6                 |

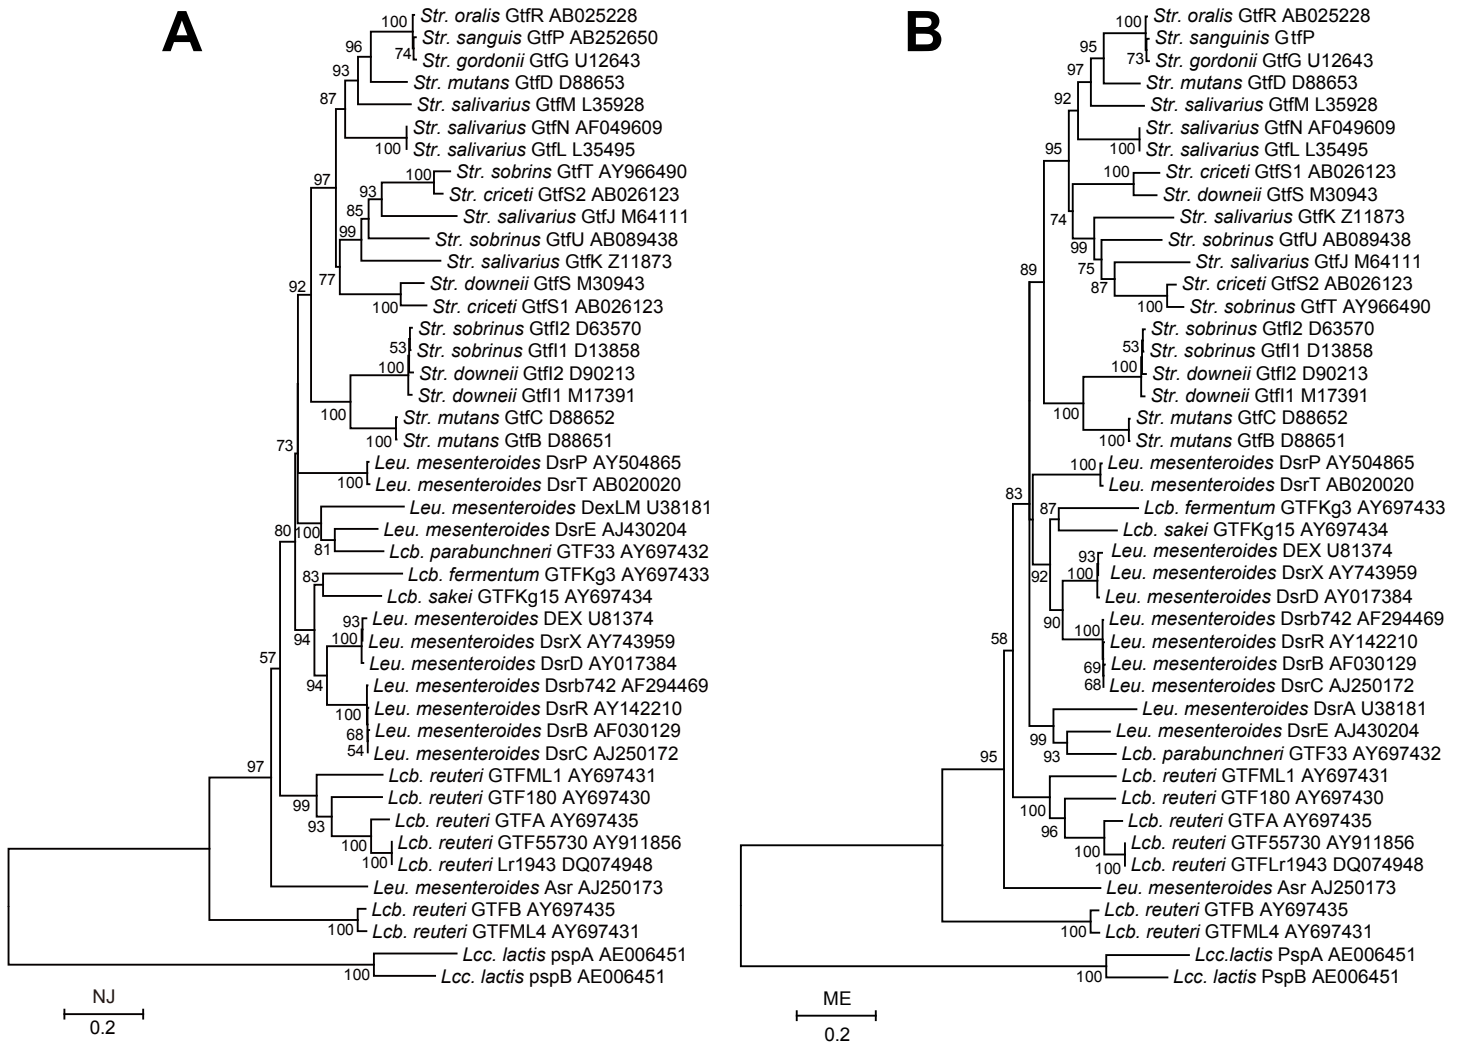

**Figure S1| Phylogenetic tree of the amino acid sequences of glycosyl hydrolase family 70 enzymes constructed by the NJ (A) and the ME (B) methods.** The value on each branch is the estimated confidence limit (expressed as a percentage) for the position of the branches, as determined by bootstrap analysis. Only values exceeding 50% are shown.
